# Supplementary material for: Preparation and Characterization of Protocatechuic Acid Sulfates
Source: MDPI journal article supplement (doi:10.3390/molecules24020307), 2019-01-16
Supplement: s1 [file s1]

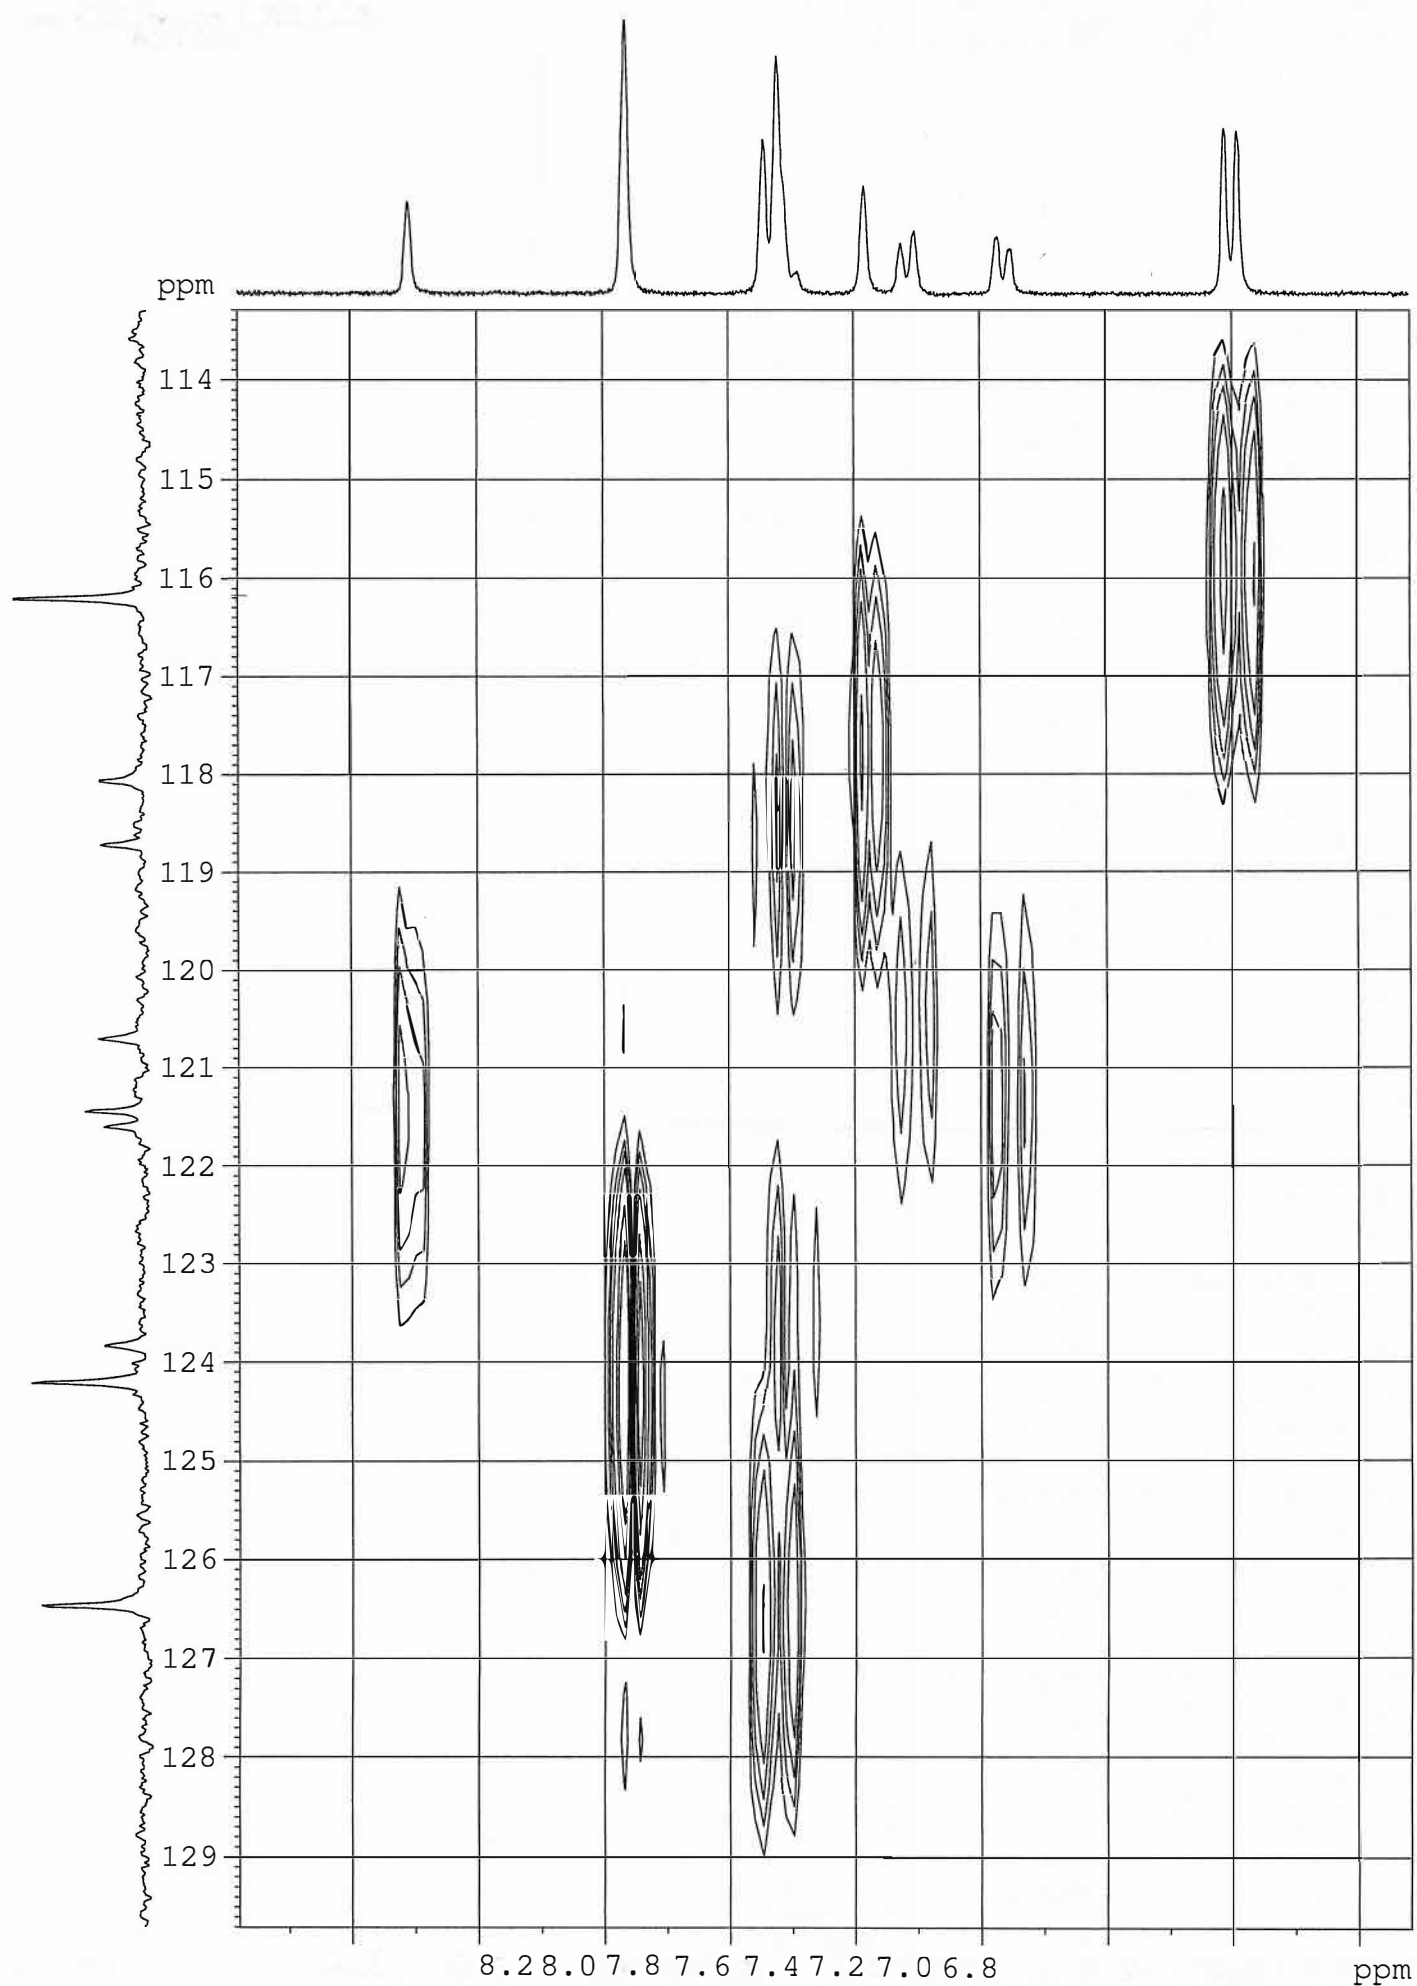

**Figure S2.**  $^1\text{H}$ - $^{13}\text{C}$  HSQC 2D NMR correlation spectroscopy of PCA-3-sulfate, and PCA-4 sulfate (400 MHz/100 MHz, DMSO- $d_6$ ).
